# Supplementary material
Source: publisher figshare collection journal article supplement (https://geolsoc.figshare.com/ndownloader/files/14358602)
Supplement: Supplementary file 1 [file 14358602]

## Sheet: Sheet1
Table S7 Sandstone chemistry ch. 10 Waiua Fm. XRF
Sample name	NZ13-284	NZ13-285		NZ13-310	NZ13-311	NZ13-319	NZ13-320	NZ13-321	NZ13-322
Rock type	fine sandstone	silty mudstone		med. sandstone	red siltstone	red shale	med. sandstone	red siltstone	red siltstone
Region	Maitai River, Nelson area	Maitai River, Nelson area		Roding River, Nelson area	Roding River, Nelson area	Roding River, Nelson area	Roding River, Nelson area	Roding River, Nelson area	Roding River, Nelson area
GPS	S41 29888 E173 33716	S41 29888 E173 33716		S41 38886 E173 25100	S41 38279 E173 22273	S41 37883 E173 23146	S41 37883 E173 23146	S41 38655 E173 16868	S41 38655 E173 16868
Major Elements
SiO2	60.4507	46.1153		49.4	57.987	54.4592	49.6584	54.2314	55.7015
Al2O3	17.3555	12.9046		19.16	17.9351	20.3212	17.2044	19.8128	18.8668
Fe2O3	7.6014	6.9947		14.37	10.2616	8.0295	10.3248	11.2563	9.5445
MgO	2.678	3.5934		4.17	1.97925	2.4139	5.2164	2.4969	2.4644
CaO	2.2763	20.6903		1.89	2.3142	3.1209	7.02	1.7255	3.2724
Na2O	2.5853	3.1075		2.46	1.6443	1.5251	3.5532	1.53265	2.2523
K2O	2.01571	1.04977		1.077	2.53851	2.82901	0.22032	3.01556	1.98061
TiO2	0.83842	0.61359		1.022	0.78764	0.95445	1.13616	0.955115	0.98071
MnO	0.12051	0.06554		0.229	0.088305	0.10504	0.1944	0.063945	0.0707
P2O5	0.1236	0.11865		0.063	0.10353	0.1212	0.40176	0.141085	0.13534
LOI	3.68	4.09		5.63	4.21	5.55	4.84	4.65	4.64
Total	99.7254	99.3433		99.471	99.8494	99.4295	99.7698	99.8814	99.9093
Trace Elements
Zn	107.4	107		193.9	109.4	108.6	116.7	93.9	87.9
Cu	48.3	48		59.6	20.2	54.6	40.1	9.7	28.9
Ni	25.5	24.5		55.7	56.5	28.2	30.9	42.6	49.1
Cr	50.8	65		136.7	53	59.1	101.2	57.3	57.4
V	168.9	160.5		241.2	206.5	260.6	285.5	194.2	202.6
Ba	313.2	239.7		206.3	379.1	423.5	42.6	416.3	273.6
Sc	22.2	23.4		30.1	23.5	33.1	28.8	32.1	31.8
La	17.1	13.7		7.3	21.4	17.8	13.9	9.8	11.2
Ce	39.4	29.2		17.2	47.6	46.1	30.5	26	30.4
Nd	20.9	17.9		10.4	23.9	24.8	19.8	15.3	16.8
U	1.5	1.2		1.1	1.2	1.7	1.1	0.8	0.7
Th	7	4.4		1.4	8.2	8.7	5.7	4.7	4.8
Pb	10.3	7.1		6.2	24.2	12.7	9.7	7.7	16.6
Nb	7.1	5.3		4.4	7.4	7.5	3.5	4.7
Zr	149.5	116.7		99.6	143.6	164.3	116.3	114.3
Y	27	23.8		15.5	25.8	29.6	26.7	24.5
Sr	155.7	187.5		132.2	160.2	157.4	132	114.1
Rb	68.6	48.5		31	82.9	92.1	5.4	80
